# Supplementary material for: The Aurora kinase inhibitor AT9283 inhibits Burkitt lymphoma growth by regulating Warburg effect
Source: PeerJ. 2023 Dec 11;11:e16581. doi: 10.7717/peerj.16581 (PMC10720464; doi:10.7717/peerj.16581)
Supplement: Supplemental Information 10 [file peerj-11-16581-s010.xlsx]

## Sheet: Sheet1
	0	1	2	4			0	1	2	4			0	1	2	4
aurora A	22.25	22	22.43	22.22		aurora A	22.31	22.15	22.31	22.34		aurora A	22.3	22.07	22.44	22.47
ACTIN	10.08	10.29	10.16	10.33		ACTIN	10.95	11.26	10.9	11.13		ACTIN	10.24	10.5	10.32	10.67
	0	-0.46	0.1	-0.28			0	-0.47	0.05	-0.15			0	-0.49	0.06	-0.26
	0	0.46	-0.1	0.28			0	0.47	-0.05	0.15			0	0.49	-0.06	0.26
	1	1.37554	0.933033	1.21419			1	1.38511	0.965936	1.10957			1	1.40444	0.959264	1.19748
	0	1	2	4			0	1	2	4			0	1	2	4
aurora B	27.67	28.48	28.52	28.86		aurora B	23.91	24.45	24.62	25.02		aurora B	24.16	24.7	24.87	25.27
ACTIN	11.2	12	11.84	11.66		ACTIN	9.76	10.13	9.97	9.82		ACTIN	10.01	10.37	10.2	10.09
	0	0.01	0.21	0.73			0	0.17	0.5	1.05			0	0.18	0.52	1.03
	0	-0.01	-0.21	-0.73			0	-0.17	-0.5	-1.05			0	-0.18	-0.52	-1.03
	1	0.993092	0.864537	0.602904			1	0.888843	0.707107	0.482968			1	0.882703	0.697372	0.48971
	0	1	2	4			0	1	2	4			0	1	2	4
PKM	14.83	15.34	15.26	15.28		PKM	17.65	18.47	18.3	18.35		PKM	15.06	15.55	15.52	15.33
ACTIN	9.76	10.13	9.97	9.82		ACTIN	11.2	12	11.84	11.66		ACTIN	9.99	10.49	10.28	10.05
	0	0.14	0.22	0.39			0	0.02	0.01	0.24			0	-0.01	0.17	0.21
	0	-0.14	-0.22	-0.39			0	-0.02	-0.01	-0.24			0	0.01	-0.17	-0.21
	1	0.907519	0.858565	0.76313			1	0.986233	0.993092	0.846745			1	1.00696	0.888843	0.864537
	0	1	2	4			0	1	2	4			0	1	2	4
HK2	19.16	19.17	19.51	19.6		HK2	21.03	21.51	21.71	21.85		HK2	20.06	20.25	19.74	20.14
ACTIN	9.76	10.13	9.97	9.82		ACTIN	11.2	12	11.84	11.66		ACTIN	10.95	11.16	10.53	10.88
	0	-0.36	0.14	0.38			0	-0.32	0.04	0.36			0	-0.02	0.1	0.15
	0	0.36	-0.14	-0.38			0	0.32	-0.04	-0.36			0	0.02	-0.1	-0.15
	1	1.28343	0.907519	0.768438			1	1.24833	0.972655	0.779165			1	1.01396	0.933033	0.90125
	0	1	2	4			0	1	2	4			0	1	2	4
HIF	16.57	16.42	16.34	16.74		HIF	18.91	18.99	19.11	18.99		HIF	19.53	19.6	19.65	19.68
ACTIN	9.97	10.03	9.81	9.63		ACTIN	10.95	11.26	10.9	11.13		ACTIN	10.24	10.5	10.32	10.67
	0	-0.21	-0.07	0.51			0	-0.23	0.25	-0.1			0	-0.19	0.04	-0.28
	0	0.21	0.07	-0.51			0	0.23	-0.25	0.1			0	0.19	-0.04	0.28
	1	1.15669	1.04972	0.702222			1	1.17283	0.840896	1.07177			1	1.14076	0.972655	1.21419
	P0	1	2	4			P0	1	2	4			P0	1	2	4
c-myc	15.76	16.47	16.74	17.07		c-myc	16.24	16.98	17.05	17.61		c-myc	15.45	16.19	16.67	16.75
ACTIN	10.12	10.44	10.18	10.29		ACTIN	11.04	11.44	10.92	11.21		ACTIN	9.8	10.22	10.03	9.86
	0	0.39	0.92	1.14			0	0.34	0.93	1.2			0	0.32	0.99	1.24
	0	-0.39	-0.92	-1.14			0	-0.34	-0.93	-1.2			0	-0.32	-0.99	-1.24
	1	0.76313	0.528509	0.45376			1	0.790041	0.524858	0.435275			1	0.80107	0.503478	0.423373
