# Supplementary material for: The Aurora kinase inhibitor AT9283 inhibits Burkitt lymphoma growth by regulating Warburg effect
Source: PeerJ. 2023 Dec 11;11:e16581. doi: 10.7717/peerj.16581 (PMC10720464; doi:10.7717/peerj.16581)
Supplement: Supplemental Information 11 [file peerj-11-16581-s011.xlsx]

## Sheet: Figure1
figure 1
A	Akata-actin					Akata- auroraB			Akata- auroraA					P3HR1- auroraA					P3HR1- auroraB					actin
（gray value)	30908	30692.4	31282		0	34396.1	30780.7	31729	1	38612.3	39354	34708.3		1	34066.4	34073.5	33426.6		1	28869.4	28792.5	28245.9		1	31269.8	31265.8	30672.3
	37052.9	37057.3	36591		1	29421.4	24044.8	25411.3	2	34061.6	33633	29381.2		2	21639	18693.9	17930.2		2	30392.4	29997.1	28771.6		2	30119.2	29966.8	28742.6
	35357.8	34176.9	32567.2		2	14641.5	12363.9	12389.5	3	22954.9	21873.8	21283.8		3	15428	13564.9	13627.9		3	28674.4	28677.1	28810.5		3	27646.8	26401.3	26524.1
	35337	36905.5	34691		4	9351.05	9349.46	7978.89	4	16008.3	15047.8	15438.3		4	12684.4	11075.7	9582.65		4	7984.15	7989.12	6912.13		4	39408.2	37193.1	32179.2
					Ratio to actin
						1.11285	1.00287	1.01429		1.24926	1.25804	1.13084			1.08943	1.08957	1.0898			0.923234	0.923352	0.920893
						0.794038	0.648855	0.694469		0.919268	0.91916	0.792859			0.718448	0.722102	0.623822			1.00907	1.0142	1.00101
						0.414095	0.361762	0.38043		0.64922	0.67165	0.622754			0.558039	0.584364	0.513795			1.03717	1.0861	1.0862
						0.264625	0.253335	0.229999		0.453019	0.433766	0.418321			0.321871	0.341041	0.29779			0.202601	0.214667	0.214801
					Ratio to 0uM
					0	1	1	1		1	1	1			1	1	1			1	1	1
					1	0.713516	0.646995	0.684685		0.735847	0.730628	0.701124			0.659469	0.662738	0.572419			1.09297	1.09839	1.087
					2	0.372102	0.360725	0.375071		0.519681	0.533886	0.5507			0.512229	0.536324	0.471458			1.12341	1.17625	1.17951
					4	0.23779	0.252609	0.226759		0.362628	0.344795	0.36992			0.295448	0.313005	0.273252			0.219447	0.232487	0.233253
B							C							D
24h abs	1.054	0.685	0.535	0.415	0.36		24h abs	2.216	1.905	1.514	1.053	0.499			24h abs	0.702	0.37	0.303	0.22	0.172
	1.144	0.788	0.633	0.417	0.406			2.287	1.905	1.629	1.055	0.499			vialility	1	0.527066	0.431624	0.31339	0.245014
	1.318	0.826	0.694	0.517	0.427			2.364	1.962	1.646	0.81	0.413
24h viability							24h viability
	1	0.649905	0.50759	0.393738	0.341556			1	0.859657	0.683213	0.475181	0.225181
	1	0.688811	0.553322	0.36451	0.354895			1	0.832969	0.712287	0.461303	0.21819
	1	0.581184	0.526555	0.392261	0.323976			1	0.829949	0.696277	0.34264	0.174704
48h abs	2.567	0.791	0.769	0.616	0.576		48h abs	3.787	2.683	2.395	1.778	0.476
	2.477	0.8286	0.742	0.653	0.579			5.822	3.88	3.211	2.255	0.481
	2.661	0.827	0.763	0.661	0.566			4.933	3.676	3.038	2.159	0.482
48h viability							48h viability
	1	0.308142	0.299571	0.239969	0.224386			1	0.708476	0.632427	0.469501	0.125693
	1	0.334518	0.299556	0.263625	0.233751			1	0.666438	0.551529	0.387324	0.0826177
	1	0.310785	0.286734	0.248403	0.212702			1	0.745185	0.615852	0.437665	0.0977093

## Sheet: Figure2
B
Akata	cyclinB1				actin					P3HR1	cyclinB1					actin
（gray value)	0	27354.2	30804.9	27983.4	1	26465.6	42726.1	41765.5			0	27062.5	27103.9	27567.2		0	15910.8	15729.8	16023.1
	1	9200.58	12230.8	9412.19	2	31153.7	33309.3	32560.5			1	35522.3	30735.4	35290		1	14943.4	15191.7	15092.3
	2	4518.66	6538.25	4622.59	3	29077.4	29950.1	29276.8			2	22036.9	21964.2	23749.5		2	12386.6	12607.7	13587.5
	4	4408.66	6470.49	4510.06	4	30510.2	33249.1	32501.5			4	12049.1	11815.5	13508.1		4	14642	14231	15954.2
Ratio to actin		1.03358	0.737569	0.654948							0	1.70089	1.7231	1.72046
		0.295328	0.375632	0.282569							1	2.37712	2.02317	2.33828
		0.155401	0.223325	0.154343							2	1.7791	1.74213	1.7479
		0.144498	0.199083	0.135645							4	0.822913	0.830264	0.846679
Ratio to 0uM		1	1	1							0	1	1	1
		0.285735	0.509284	0.431438							1	1.39757	1.17415	1.3591
		0.150353	0.302786	0.235657							2	1.04598	1.01104	1.01595
		0.139804	0.269917	0.207108							4	0.483812	0.481844	0.492123

## Sheet: Figure3
B
Akata					P3HR1
	4.9	18.1	20.5	31.9		15.9	63.3	49.2	54.8
	9.4	23.2	27.8	37.6		13.1	50.1	49.4	57.5
	8.3	25.4	29.3	34.6		12.4	52.9	50.8	56.4
D
Akata					P3HR1
actived-caspase3	4.6	18.9	23.7	23.2	actived-caspase3	9	44	37.4	43.1
	5.2	20.6	25.3	25.2		9.7	48.2	42.4	46.3
	6	17.98	22.6	24.8		9.68	46.7	39.5	45.1
cleaved-PARP	3.9	13.7	19.5	41.6		9.2	31.3	40.8	51
	6.8	15.6	18.7	38.6		10.8	40.2	45.3	53.8
	7.5	12	20.9	42.1		11.5	36.2	42.1	50.98
E
Akata	cleaved-PARP				Pro-caspase3				cleaved caspase3				actin
	1	8687.95	9420.3	17266.3	1	23799.7	23113.2	45934.9	1	19510.4	19776.9	38774.7	1	33926.8	27277.3	54210.6
	2	10829.5	13636.7	20391.4	2	27103.9	25502.5	48019.7	2	23268.7	23386.4	43813.7	2	32775.5	26453.5	49810.5
	3	16089.4	16173.2	36861.1	3	22895	21682.4	49674.8	3	24002.9	25616.6	54991	3	30744.7	24155.4	55340.6
	4	31271.6	31254.7	67268	4	16189.4	14949.7	32158.1	4	25576.6	35214.8	55017.6	4	31748	25293.1	54407.7
	0.25608	0.345352	0.318504		0.701502	0.872508	0.847342		0.575074	0.72503	0.715261
	0.330415	0.515498	0.409379		0.826958	1.02459	0.964049		0.709942	0.884056	0.879608
	0.523323	0.669549	0.666078		0.744684	0.947822	0.89762		0.780716	1.06049	0.993684
	0.984993	1.2357	1.23637		0.509933	0.640072	0.591058		0.805613	1.39227	1.01121
	1	1	1		1	1	1		1	1	1
	1.29028	1.28532	1.49267		1.17884	1.1743	1.13773		1.23452	1.21934	1.22977
	2.0436	2.09127	1.93874		1.06156	1.08632	1.05934		1.35759	1.46268	1.38926
	3.84643	3.8818	3.57809		0.726917	0.7336	0.697544		1.40088	1.92029	1.41377
P3HR1	cleaved-PARP				Pro-caspase3				cleaved caspase3				actin
	1	24111.6	13136	52316.2	1	25261.2	23618.8	54810.7	1	3490.35	3490.35	7573.2	1	30412.5	21260.1	46129.3
	2	29461.6	18890.2	64790.5	2	24478.1	23016.6	53830.9	2	26271.9	33734.9	57775.7	2	30031.2	21262.5	46759.4
	3	32933.2	22169.1	70866	3	13025.2	11655.4	28027.7	3	34880.8	37451.8	75056.8	3	31583.7	23028	49551.9
	4	36663.4	25599.8	78979.5	4	11892	10088	25617.4	4	33534.2	31608.2	72238.5	4	35445.5	26299.5	56653.7
		0.792817	1.13412	0.431927		0.830619	1.1882	0.776612		0.114767	0.164173	0.114767
		0.981034	1.38561	0.629019		0.815088	1.15123	0.766421		0.874818	1.23559	1.12333
		1.04273	1.43014	0.701916		0.412402	0.565624	0.369033		1.10439	1.51471	1.18579
		1.03436	1.39408	0.722231		0.3355	0.452175	0.284605		0.946077	1.27509	0.891742
		1	1	1		1	1	1		1	1	0.999997
		1.2374	1.22175	1.45631		0.981302	0.968889	0.986878		7.62258	7.52617	9.7879
		1.31522	1.26101	1.62508		0.4965	0.476035	0.475183		9.62293	9.22631	10.3322
		1.30467	1.22921	1.67212		0.403916	0.380556	0.36647		8.24348	7.76674	7.77002

## Sheet: Figure5
A and B
	Akata
		0			1			2			4
	Glucose	100	100	100	68.1416	63.7694	71.7703	66.1947	62.224	75.5981	61.7699	56.7294	62.6794
	Lactate	100	100	100	81.23	76.5408	77.7241	65.72	68.3897	57.3167	56.5716	59.6422	53.0528
	P3HR1
		0			1			2			4
	Glucose	100	100	100	85.9033	113.091	83.0065	79.6841	55.2727	75.1679	64.1362	52.3636	62.3514
	Lactate	100	100	100	98.2699	96.3977	95.1965	93.0796	90.2017	74.9636	69.5502	55.7637	43.6681
D
Akata	HK2				GLUT				LDHA				PKM2			ACTIN
	34297.7	30403.8	62936.9		42046.8	32778.7	77156.8		37140.3	37078.9	68153.2		28305.7	28305.7	51941.6	35839.5	30884.3	56673.4
	28636.6	25099.7	48756.6		36400.8	27797.2	61975.8		34121.5	34343.9	58095.1		25326	25326	43119.9	35569.5	31054.8	52873.8
	24427	20836.4	44024.9		27183.7	18819.8	48993.1		31321	28745.1	56449.9		23631.7	21584.9	42591.4	32962	28559.5	51472.8
	19205	15656.5	32521.2		28414.6	20227.2	48116.4		18178.7	15210.4	30783.2		22465.2	18598.4	38041.8	34995.1	30220.8	51174.9
	0.956978	1.11052	0.984439		1.1732	1.36143	1.06134		1.03629	1.20256	1.20057		0.789791	0.916508	0.916508
	0.805089	0.922132	0.80824		1.02337	1.17215	0.8951		0.95929	1.09875	1.10591		0.712014	0.815525	0.815525
	0.741068	0.855302	0.729576		0.824698	0.951825	0.658966		0.950217	1.09669	1.0065		0.716938	0.827453	0.755788
	0.548792	0.635491	0.518072		0.81196	0.940234	0.669315		0.519464	0.601529	0.503309		0.641952	0.743368	0.615417
	1	1	1		1	1	1		1	1	1		1	1	1
	0.841283	0.830361	0.821016		0.872292	0.860968	0.843371		0.925692	0.913675	0.921154		0.901522	0.889818	0.889818
	0.774383	0.770183	0.741109		0.70295	0.699136	0.620882		0.916937	0.911963	0.838348		0.907757	0.902832	0.824638
	0.573463	0.572247	0.526261		0.692091	0.690623	0.630634		0.50127	0.500207	0.419224		0.812812	0.811087	0.67148
P3HR1
	HK2				GLUT				LDHA				PKM2				ACTIN
	38945	29788.6	56709.2		22461.4	18529.6	32706.7		32104.7	29795.4	46748.6		37422.8	28240.5	54492.5		39348.3	34212.9	49818.5
	36170	27116.7	53082.5		15726.9	12283.4	23080.5		36742.4	34299.1	53922.6		31091.9	26121.4	45630		37665.7	32911	48299.7
	29139.5	20214	42182.3		7607.42	4464.23	11012.5		30681.6	28125.9	44414.6		32326	24039.5	46795.2		39925.4	35410.4	51260.1
	22406.9	13376.2	29745		5226.66	2853.3	6938.36		11018.2	8197.09	14626.6		21100.2	13164	28010.4		46087.7	41056	54501.5
	0.989752	0.870685	1.13832		0.570835	0.541597	0.656518		0.81591	0.93838	0.870882		0.951065	1.09382	0.825434
	0.96029	0.823941	1.09902		0.417538	0.37323	0.47786		0.975487	1.11642	0.7		0.82547	0.944727	0.793697
	0.729848	0.570848	0.822907		0.190541	0.126071	0.214835		0.768471	0.866455	0.794281		0.80966	0.912896	0.678882
	0.486178	0.325805	0.545764		0.113407	0.0694977	0.127306		0.239071	0.268371	0.199657		0.457827	0.513938	0.320636
	1	1	1		1	1	1		1	1	1		1	1	1
	0.970233	0.946313	0.965483		0.731452	0.689129	0.727871		1.19558	1.18973	0.803783		0.867943	0.863693	0.961551
	0.737405	0.655631	0.722916		0.333793	0.232776	0.327235		0.941858	0.923352	0.912043		0.85132	0.834593	0.822454
	0.491212	0.374194	0.479448		0.198668	0.12832	0.193911		0.293011	0.285994	0.229258		0.481384	0.469855	0.388445

## Sheet: Figure6
B
Akata		c-MYC				HIFa					actin
		30509	28559.8	10823.1		30801.3	38402.3	10926.8				50062.2	40629	14413.2
		10543.9	10543.9	3834.71		27886.3	34928.1	10141.9				48744.7	39548.1	14383.2
		9524.48	8162.72	3659.67		22094.3	30443.7	8489.49				44508.9	36073.2	13860.7
		6702.87	4820.58	2666.36		9947.53	16818.1	3957.07				47932.4	38602.8	15356
		0.609423	0.750917	0.570488			0.61526	0.75811	0.767093
		0.21631	0.266611	0.21631			0.572089	0.705122	0.716553
		0.21399	0.264032	0.183395			0.496402	0.612485	0.683991
		0.13984	0.173637	0.10057			0.207533	0.257689	0.350871
		1	1	0.999999			1	1	1
		0.354942	0.355047	0.379166			0.929832	0.930106	0.934115
		0.351136	0.351613	0.321471			0.806817	0.807911	0.891666
		0.229463	0.231233	0.176289			0.337309	0.33991	0.457403
P3HR1		c-MYC					HIFa					actin
		39314	39314	20248.7			52775.3	47000.6	27181.9			40115.9	35812.2	18445.1
		42067.5	37600.7	20817.7			43922.3	38167.6	21735.6			39098.7	35075.2	17357.5
		40895.1	34994.4	21874.8			50121.8	34842.5	26810.2			41068.9	37123.1	19857.2
		31820.4	31820.4	15577.7			20460.8	14895.6	10016.6			47556.6	42958.9	21030.6
		0.98001	1.09778	0.98001			1.31557	1.47367	1.17162
		1.07593	1.19935	0.961686			1.12337	1.25223	0.976186
		0.995769	1.10161	0.852091			1.22043	1.35015	0.848392
		0.669105	0.740717	0.669105			0.430241	0.476288	0.313218
		1	1	1			1	1	1
		1.09788	1.09252	0.981303			0.853903	0.849736	0.833193
		1.01608	1.00348	0.869471			0.927684	0.916183	0.724119
		0.682753	0.67474	0.682753			0.327037	0.323199	0.267338
